# Supplementary material for: Short lifetimes of organic nitrates in a sub-urban temperate forest indicate efficient assimilation of reactive nitrogen by the biosphere
Source: Copernicus journal article supplement (doi:10.5194/egusphere-2024-3437), 2024-11-12
Supplement: Supplementary file 1 [file egusphere-2024-3437-supplement.pdf]

# **Supplementary Information - Short lifetimes of organic nitrates in a sub-urban temperate forest indicate efficient assimilation of reactive nitrogen by the biosphere**

Simone T. Andersen<sup>1</sup>, Rolf Sander<sup>1</sup>, Patrick Dewald<sup>1</sup>, Laura Wüst<sup>1</sup>, Tobias Seubert<sup>1</sup>, Gunther N. T. E. Türk<sup>1</sup>, Jan Schuladen<sup>1</sup>, Max R. McGillen<sup>2</sup>, Chaoyang Xue<sup>2</sup>, Abdelwahid Mellouki<sup>2,3</sup>, Alexandre Kukui<sup>4</sup>, Vincent Michoud<sup>5</sup>, Manuela Cirtog<sup>5</sup>, Mathieu Cazaunau<sup>5</sup>, Astrid Bauville<sup>5</sup>, Hichem Bouzidi<sup>5</sup>, Paola Formenti<sup>5</sup>, Cyrielle Denjean<sup>6</sup>, Jean-Claude Etienne<sup>6</sup>, Olivier Garrouste<sup>6</sup>, Christopher Cantrell<sup>7</sup>, Jos Lelieveld<sup>1</sup>, John N. Crowley<sup>1</sup>

<sup>1</sup>Atmospheric Chemistry Department, Max-Planck-Institute for Chemistry, 55128-Mainz, Germany

<sup>2</sup>Institut de Combustion, Aérothermique, Réactivité Environnement (ICARE), CNRS, 1C Avenue de la Recherche Scientifique, CEDEX 2, 45071 Orléans, France

<sup>3</sup>University Mohammed VI Polytechnic (UM6P), Lot 660, Hay Moulay Rachid Ben Guerir, 43150, Morocco

<sup>4</sup>Laboratoire de Physique et Chimie de l'Environnement et de l'Espace (LPC2E), CNRS Orléans, France

<sup>5</sup>Université Paris Cité and Univ Paris Est Creteil, CNRS, LISA, F-75013 Paris, France

<sup>6</sup>CNRM, Université de Toulouse, Météo-France, CNRS, Toulouse, France

<sup>7</sup>Univ Paris Est Creteil and Université de Paris Cité, CNRS, LISA, F-94010 Créteil, France

*Correspondence to:* Simone T. Andersen ([simone.andersen@mpic.de](mailto:simone.andersen@mpic.de)) and John N. Crowley ([john.crowley@mpic.de](mailto:john.crowley@mpic.de))

**Table S1: List of PANs included in Figure 8 under “Other PANs” from the MCM coming from the degradation of acetaldehyde, isoprene, propane, n-butane, isobutane,  $\alpha$ -pinene,  $\beta$ -pinene, and limonene.**

| MCM Name  | Structure                                                                           |
|-----------|-------------------------------------------------------------------------------------|
| PPN       | 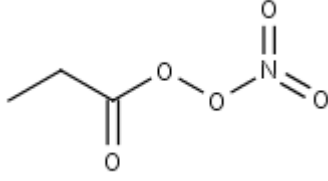   |
| PBN       |    |
| C10PAN2   |   |
| C312COPAN |  |
| C3PAN1    |  |

|         |                                                                                                                                                                                                                                                                                                               |
|---------|---------------------------------------------------------------------------------------------------------------------------------------------------------------------------------------------------------------------------------------------------------------------------------------------------------------|
| C3PAN2  | 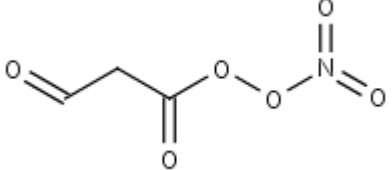 <p>Chemical structure of 3-(nitrooxy)propanal: A three-carbon chain with an aldehyde group at C1 and a nitrooxy group at C3.</p>                                                                                            |
| C4PAN5  |  <p>Chemical structure of 2-(nitrooxy)-2-methylpropanoic acid: A central carbon atom bonded to a methyl group, a hydroxyl group, and a nitrooxy group, with a carboxylic acid group attached to the same central carbon.</p> |
| C5PAN9  |  <p>Chemical structure of 3-(nitrooxy)pentane-2,4-dione: A five-carbon chain with ketone groups at C2 and C4, and a nitrooxy group at C3.</p>                                                                                |
| C721PAN |  <p>Chemical structure of 2-(nitrooxy)-2,2-dimethylcyclobutane-1-carboxylic acid: A cyclobutane ring with two methyl groups on one carbon, a nitrooxy group on another, and a carboxylic acid group on a third.</p>         |
| C7PAN3  |  <p>Chemical structure of 3-(nitrooxy)heptane-2,4,6-trione: A seven-carbon chain with ketone groups at C2, C4, and C6, and a nitrooxy group at C3.</p>                                                                    |
| C811PAN |  <p>Chemical structure of 2-(nitrooxy)-2,2-dimethylcyclobutane-1-carboxylic acid: A cyclobutane ring with two methyl groups on one carbon, a nitrooxy group on another, and a carboxylic acid group on a third.</p>       |

|            |                                                                                     |
|------------|-------------------------------------------------------------------------------------|
| C89PAN     | 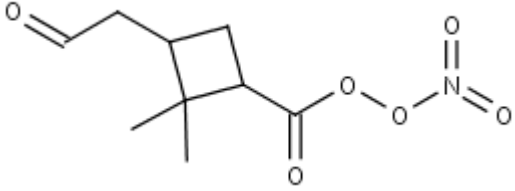   |
| C9PAN2     |    |
| CHOC3COPAN |   |
| HCOCOH PAN |  |
| MPAN       |  |

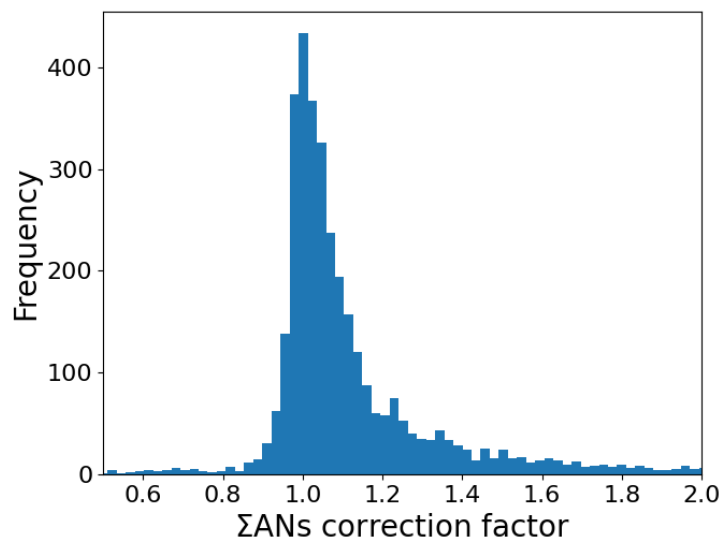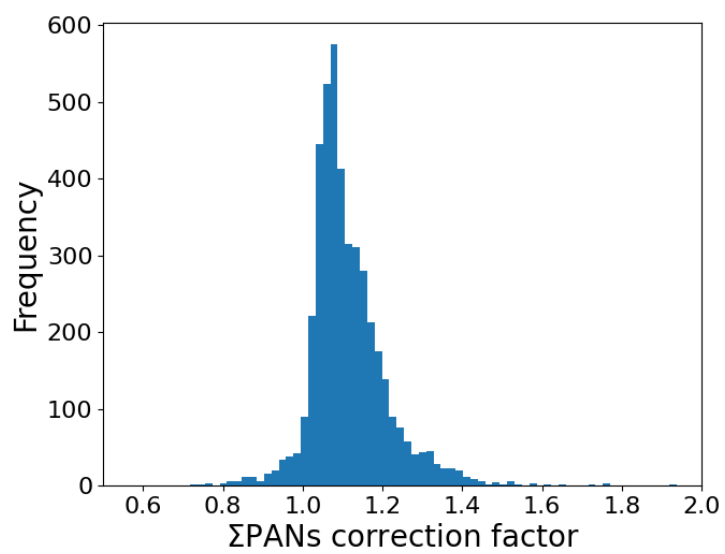

Figure S1: Distribution of correction factors for the  $\Sigma$ ANs (top) and  $\Sigma$ PANs (bottom) measurements.

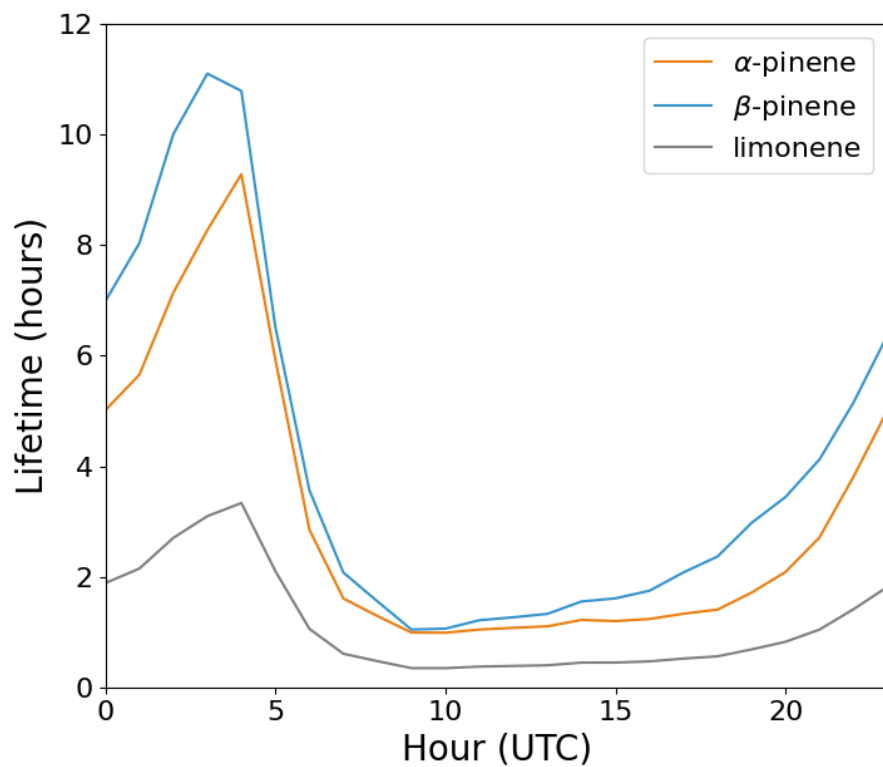

Figure S2: The derived diel profile of the lifetime of  $\alpha$ -pinene,  $\beta$ -pinene, and limonene during the ACROSS campaign when taking reactions with OH, O<sub>3</sub>, and NO<sub>3</sub> into account using the rate coefficients in Table 1.

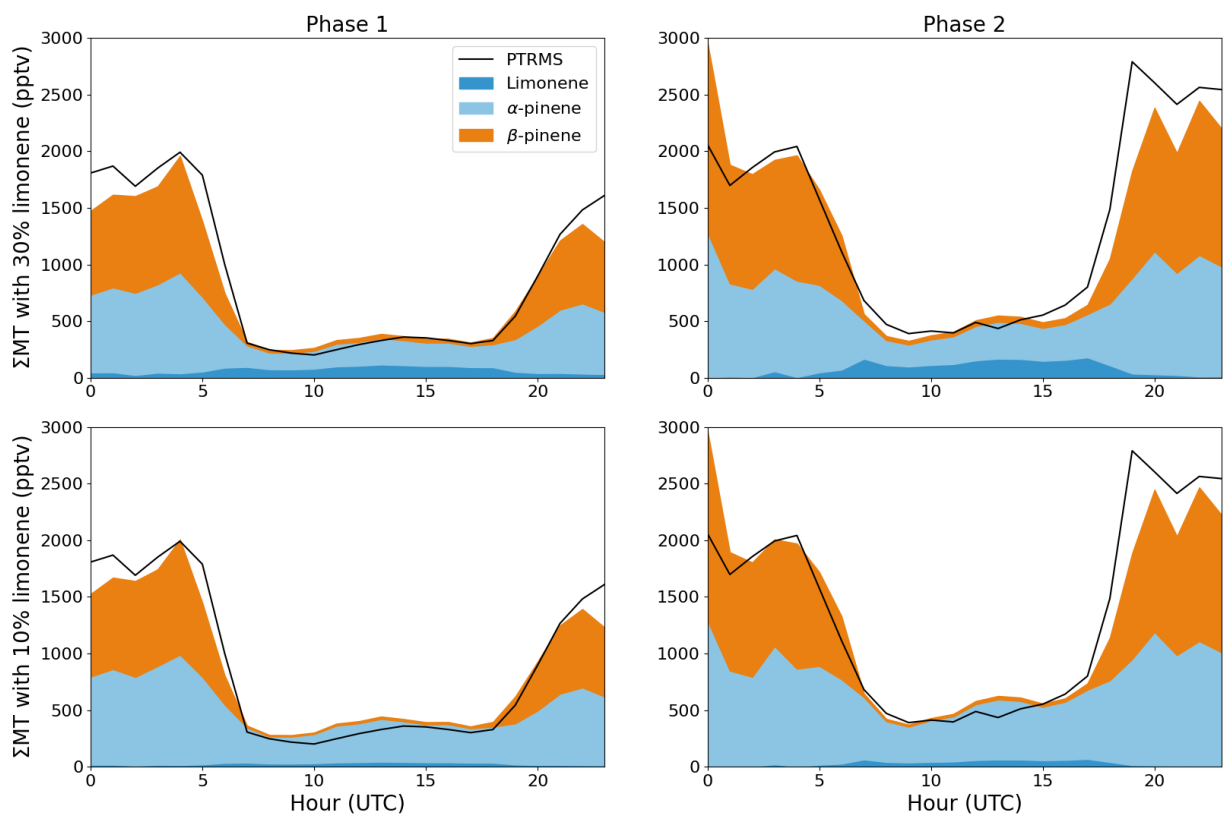

Figure S3: Average diel profiles for the measured total monoterpenes by PTRMS for phase 1 (left) and 2 (right) together with the derived monoterpenes mixtures of 10%  $\beta$ -pinene, 60%  $\alpha$ -pinene, and 30% limonene (top) and 5%  $\beta$ -pinene, 85%  $\alpha$ -pinene, and 10% limonene (bottom).

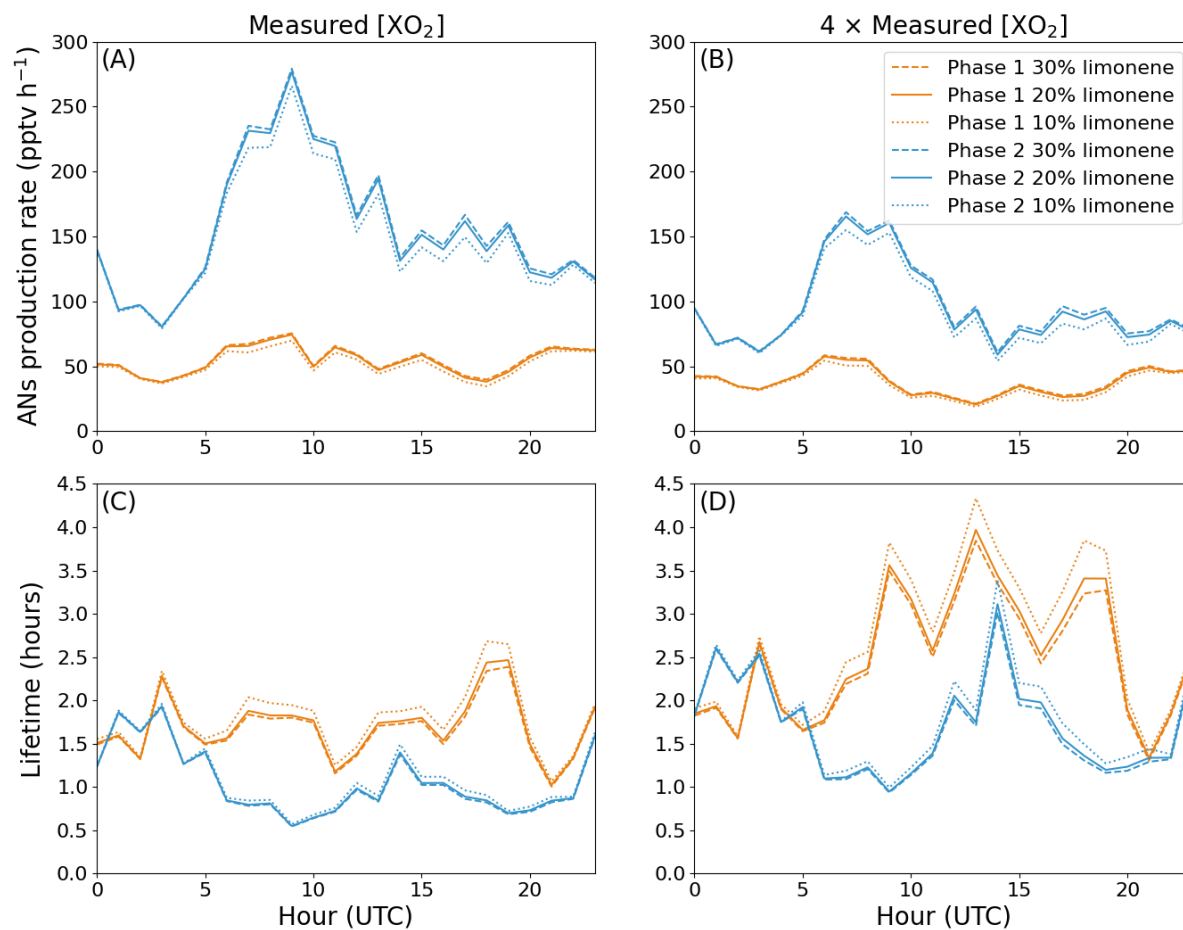

Figure S4: Average diel profiles of the total ANs production rate (top) and lifetime for phase 1 (orange) and 2 (blue) for the three different monoterpene mixtures (dotted, solid, and dashed lines) using the measured [XO<sub>2</sub>] (left) and 4 × [XO<sub>2</sub>] (right).



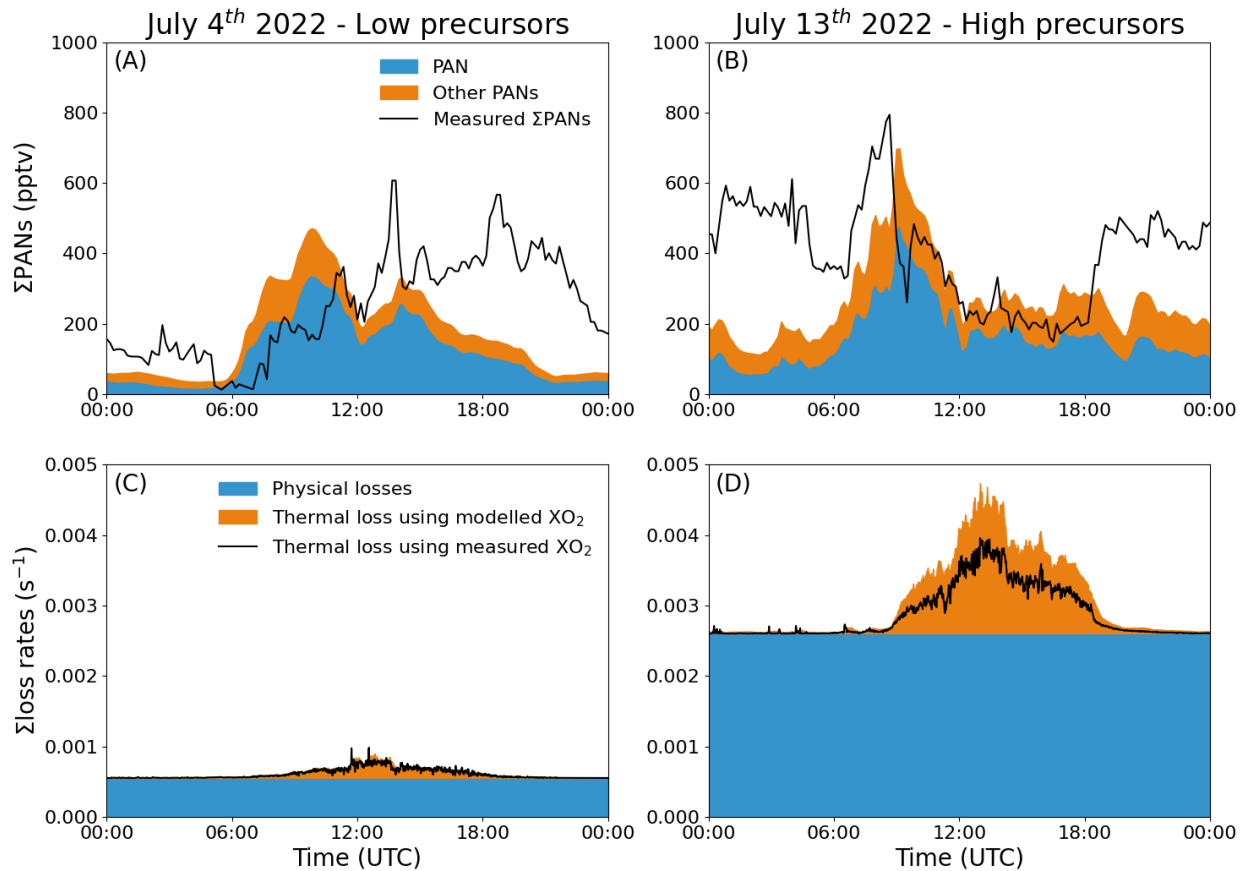

Figure S5: The measured and modelled when optimizing for daytime agreement  $\Sigma$ PANs is plotted for two individual days; one with low precursors (A) and one with high precursors (B). The optimised physical loss for each day is shown in panel C and D together with the thermal decomposition when taking recombination into account using both the measured and modelled mixing ratio of  $XO_2$ .

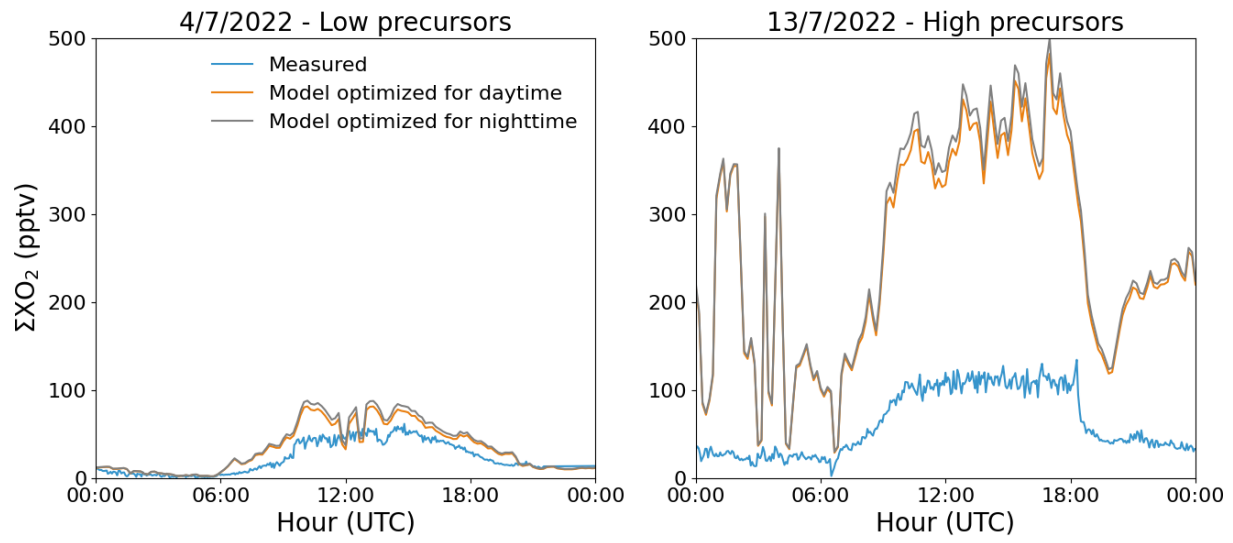

Figure S6: Measured and modelled  $\text{XO}_2$  for a low and high precursor (of PANs) day.
